# Supplementary material for: A Lard and Soybean Oil Mixture Alleviates Low-Fat–High-Carbohydrate Diet-Induced Nonalcoholic Fatty Liver Disease in Mice
Source: MDPI journal article supplement (doi:10.3390/nu14030560), 2022-01-27
Supplement: s1 [file s1]

**Table S1 Composition of diets**

|                                       | <b>L1</b>    | <b>S1</b>    | <b>LS1</b>   | <b>L2</b>    | <b>S2</b>    | <b>LS2</b>   |
|---------------------------------------|--------------|--------------|--------------|--------------|--------------|--------------|
| <b>Casein<br/>(g)</b>                 | <b>139</b>   | <b>139</b>   | <b>139</b>   | <b>118.9</b> | <b>118.9</b> | <b>118.9</b> |
| <b>Corn starch<br/>(g)</b>            | <b>467.3</b> | <b>467.3</b> | <b>467.3</b> | <b>450.6</b> | <b>450.6</b> | <b>450.6</b> |
| <b>Dextrin</b>                        | <b>154.9</b> | <b>154.9</b> | <b>154.9</b> | <b>160.1</b> | <b>160.1</b> | <b>160.1</b> |
| <b>Sucrose</b>                        | <b>99.9</b>  | <b>99.9</b>  | <b>99.9</b>  | <b>103.3</b> | <b>103.3</b> | <b>103.3</b> |
| <b>Lard</b>                           | <b>39.6</b>  | <b>0</b>     | <b>18.22</b> | <b>63.4</b>  | <b>0</b>     | <b>29.16</b> |
| <b>Soybean oil</b>                    | <b>0</b>     | <b>39.6</b>  | <b>21.38</b> | <b>0</b>     | <b>63.4</b>  | <b>34.24</b> |
| <b>Cellulose</b>                      | <b>50</b>    | <b>50</b>    | <b>50</b>    | <b>51.7</b>  | <b>51.7</b>  | <b>51.7</b>  |
| <b>Mineral</b>                        | <b>35</b>    | <b>35</b>    | <b>35</b>    | <b>36.2</b>  | <b>36.2</b>  | <b>36.2</b>  |
| <b>Vitamin</b>                        | <b>10</b>    | <b>10</b>    | <b>10</b>    | <b>10.3</b>  | <b>10.3</b>  | <b>10.3</b>  |
| <b>L-cystine</b>                      | <b>1.8</b>   | <b>1.8</b>   | <b>1.8</b>   | <b>1.9</b>   | <b>1.9</b>   | <b>1.9</b>   |
| <b>Choline chloride</b>               | <b>2.5</b>   | <b>2.5</b>   | <b>2.5</b>   | <b>2.6</b>   | <b>2.6</b>   | <b>2.6</b>   |
| <b>Calcium hydrogen<br/>phosphate</b> | <b>0</b>     | <b>0</b>     | <b>0</b>     | <b>1</b>     | <b>1</b>     | <b>1</b>     |
| <b>TBHQ</b>                           | <b>0.01</b>  | <b>0.01</b>  | <b>0.01</b>  | <b>0.01</b>  | <b>0.01</b>  | <b>0.01</b>  |
| <b>Total</b>                          | <b>1000</b>  | <b>1000</b>  | <b>1000</b>  | <b>1000</b>  | <b>1000</b>  | <b>1000</b>  |
| <b>Calorie</b>                        |              |              |              |              |              |              |
| <b>Caloric density<br/>(Kcal/g)</b>   | <b>3.6</b>   | <b>3.6</b>   | <b>3.6</b>   | <b>3.7</b>   | <b>3.7</b>   | <b>3.7</b>   |
| <b>Protein<br/>(%)</b>                | <b>14.10</b> | <b>14.10</b> | <b>14.10</b> | <b>11.7</b>  | <b>11.7</b>  | <b>11.7</b>  |
| <b>Carbohydrate<br/>(%)</b>           | <b>75.90</b> | <b>75.90</b> | <b>75.90</b> | <b>72.8</b>  | <b>72.8</b>  | <b>72.8</b>  |
| <b>Fat<br/>(%)</b>                    | <b>10</b>    | <b>10</b>    | <b>10</b>    | <b>15.5</b>  | <b>15.5</b>  | <b>15.5</b>  |
| <b>Total<br/>(%)</b>                  | <b>100</b>   | <b>100</b>   | <b>100</b>   | <b>100</b>   | <b>100</b>   | <b>100</b>   |

**Table S2 Fatty acid composition of fats/oils**

|             | Lard          | Soybean oil | Mixed oil |
|-------------|---------------|-------------|-----------|
| Fatty acids | % total fatty |             |           |
| C4:0        |               |             |           |
| C6:0        |               |             |           |
| C8:0        |               |             |           |
| C10:0       | 0.08          |             | 0.04      |
| C11:0       |               |             |           |
| C12:0       | 0.07          |             | 0.03      |
| C13:0       |               |             |           |
| C14:0       | 1.49          | 0.08        | 0.73      |
| C14:1       |               |             |           |
| C15:0       | 0.06          |             | 0.03      |
| C15:1       |               |             |           |
| C16:0       | 28.80         | 10.80       | 19.08     |
| C16:1       | 1.52          | 0.09        | 0.75      |
| C17:0       | 0.83          | 0.19        | 0.48      |
| C17:1       |               |             |           |
| C18:0       | 20.50         | 3.94        | 11.56     |
| C18:1n9t    | 0.11          |             | 0.05      |
| C18:1n9c    | 33.60         | 23.80       | 28.31     |
| C18:2n6t    |               |             |           |
| C18:2n6c    | 10.90         | 53.20       | 33.74     |
| C20:0       | 0.27          | 0.37        | 0.32      |
| C18:3n6     |               |             |           |
| C20:1       | 0.68          | 0.69        | 0.69      |
| C18:3n3     | 0.49          | 6.25        | 3.60      |
| C21:0       |               |             |           |
| C20:2       | 0.45          |             | 0.21      |
| C22:0       |               | 0.43        | 0.23      |
| C20:3n6     |               |             |           |
| C22:1n9     |               | 0.10        | 0.05      |
| C20:3n3     |               |             |           |
| C20:4n6     | 0.22          |             | 0.10      |
| C23:0       |               |             |           |
| C22:2       |               |             |           |
| C24:0       |               | 0.09        | 0.05      |
| C20:5n3     |               |             |           |
| C24:1       |               |             |           |
| C22:6n3     |               |             |           |
| SFA         | 52.10         | 15.90       | 32.60     |
| MUFA        | 35.80         | 24.58       | 29.74     |
| PUFA        | 11.61         | 59.45       | 37.44     |
| n6/n3       | 22.69         | 8.51        | 9.40      |

The fatty acid profiles were identified using Aglient Gas Chromatograph 7890A in according to the GB 5009.168-2016, fatty acid test in food. Blank space means the fatty acid was undetectable.

**Table S3 Primer sequences used for quantitative real-time PCR**

| Gene           | Primer sequences                                       |
|----------------|--------------------------------------------------------|
| <i>β-actin</i> | CATCCGTAAAGACCTCTATGCCAAC<br>ATGGAGCCACCGATCCACA       |
| <i>Il1</i>     | TGCCACCTTTTGACAGTGATG<br>TGATGTGCTGCTGCGAGATT          |
| <i>Il6</i>     | TGATGGATGCTACCAAACCTGGA<br>TGTGACTCCAGCTTATCTCTTGG     |
| <i>Fabp2</i>   | GCCTGGACCATTGAGGGAAA<br>GCTTGGCCTCAACTCCTTCA           |
| <i>Ap1</i>     | ACCACTTGCCCAACAGAT<br>TTGATCCGCTCCTGAGACTC             |
| <i>Traf2</i>   | TAGCCCTACTGCTGAGCTCA<br>GCTACAAGCCTCTGCAGTCA           |
| <i>Fas</i>     | TCTGCGATGAAGAGCATGGTT<br>GCAGCGAACACAGTGTTACA          |
| <i>Bax</i>     | AGACACCTGAGCTGACCTTGGAGCA<br>GCCCATCTTCTTCCAGATGGTGAGC |
| <i>mt-Cytb</i> | AACCTCCTATCAGCCATCCC<br>TTTCGTGGAGGAAGAGGAGG           |
| <i>mt-Co2</i>  | ACCGAGTCGTTCTGCCAATA<br>ATTTAGTCGGCCTGGGATGG           |
| <i>mt-Co3</i>  | ATTAACCCTTGGCCTACTCACC<br>GCAGCCTCCTAGATCATGTGT        |
| <i>Hsl</i>     | TCTGCATCACTGTGTCCCTT<br>AATGGTCCTCTGCCTCTGTC           |
| <i>Ampka2</i>  | ACGATGAGGCTGTGAAGGAA<br>CTGATGGAGGACTAGAGGCG           |

RT-qPCR was performed in a reaction volume of 20 µL per well, containing 2 µL (200 ng) of cDNA, 0.8 µL of 10 µmol/L forward and reverse primers, 10 µL of SYBR Premix Ex Taq II, 0.4 µL of ROX Reference Dye, and 6 µL deionized water. PCR reactions started by an initial denaturing step at 95 °C for 30 s, followed by 40 cycles of 5 s at 95 °C and 30 s at 60 °C. Relative CT amounts were normalized to β-actin expression, and the results are calculated using the  $2^{-\Delta\Delta C_t}$  method.

**Table S4 Summary of RNA sequencing (RNA-Seq) data with quality trimming**

| Samples  | Raw Reads | Clean Reads | Clean % | Q30   | GC_pct |
|----------|-----------|-------------|---------|-------|--------|
| L1 rep1  | 62936332  | 61021486    | 96.96   | 94.62 | 48.27  |
| L1 rep2  | 73991956  | 72034982    | 97.36   | 94.57 | 48.82  |
| L1 rep3  | 68901732  | 65261592    | 94.72   | 94.83 | 48.66  |
| S1 rep1  | 50946666  | 48607218    | 95.41   | 94.73 | 48.96  |
| S1 rep2  | 56352896  | 55308924    | 98.15   | 94.84 | 48.55  |
| S1 rep3  | 42573676  | 41049168    | 96.42   | 94.94 | 48.31  |
| LS1 rep1 | 58172740  | 56777980    | 97.60   | 95.01 | 49.8   |
| LS1 rep2 | 54620960  | 53498972    | 97.95   | 94.71 | 49.03  |
| LS1 rep3 | 61959814  | 58026844    | 93.65   | 94.79 | 47.66  |
| L2 rep1  | 56079310  | 52171176    | 93.03   | 95.12 | 48.78  |
| L2 rep2  | 66635952  | 60732902    | 91.14   | 94    | 47.73  |
| L2 rep3  | 63467386  | 58115416    | 91.57   | 95    | 48.01  |
| S2 rep1  | 59996518  | 58513762    | 97.53   | 94.93 | 48.98  |
| S2 rep2  | 54174430  | 52807044    | 97.92   | 94.08 | 48.86  |
| S2 rep3  | 56560614  | 55382268    | 97.48   | 94.91 | 49.01  |
| LS2 rep1 | 56805642  | 54399486    | 95.35   | 94.72 | 48.8   |
| LS2 rep2 | 58397856  | 57117216    | 97.81   | 94.82 | 49.34  |
| LS2 rep3 | 69710540  | 66471738    | 95.76   | 94.65 | 48.16  |
